# Supplementary material
Source: Springer Nature journal article supplement (https://www.springermedizin.de/resource/supplementary/12889_2011_3963_MOESM1_ESM.pdf/9490846)

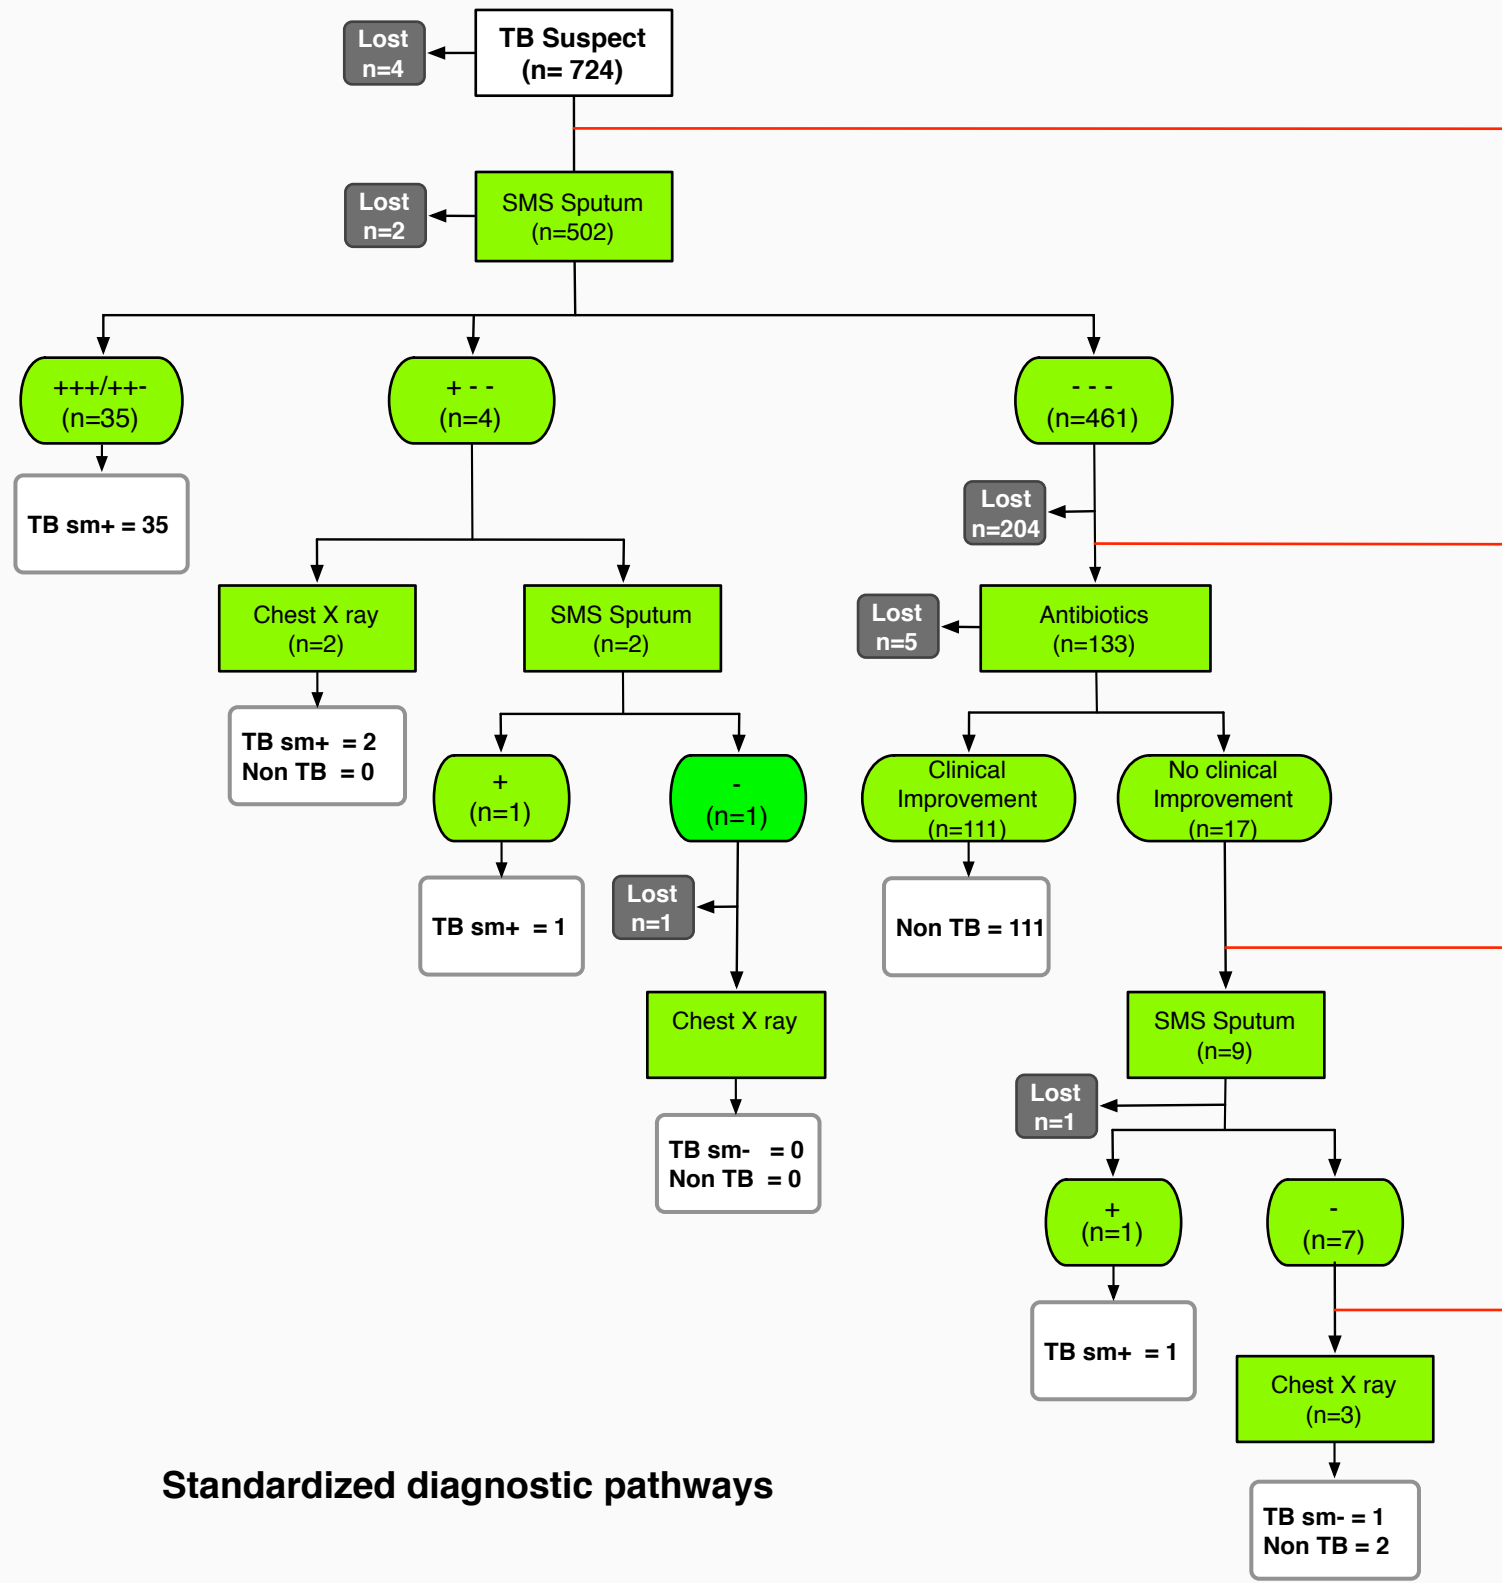

Standardized diagnostic pathways

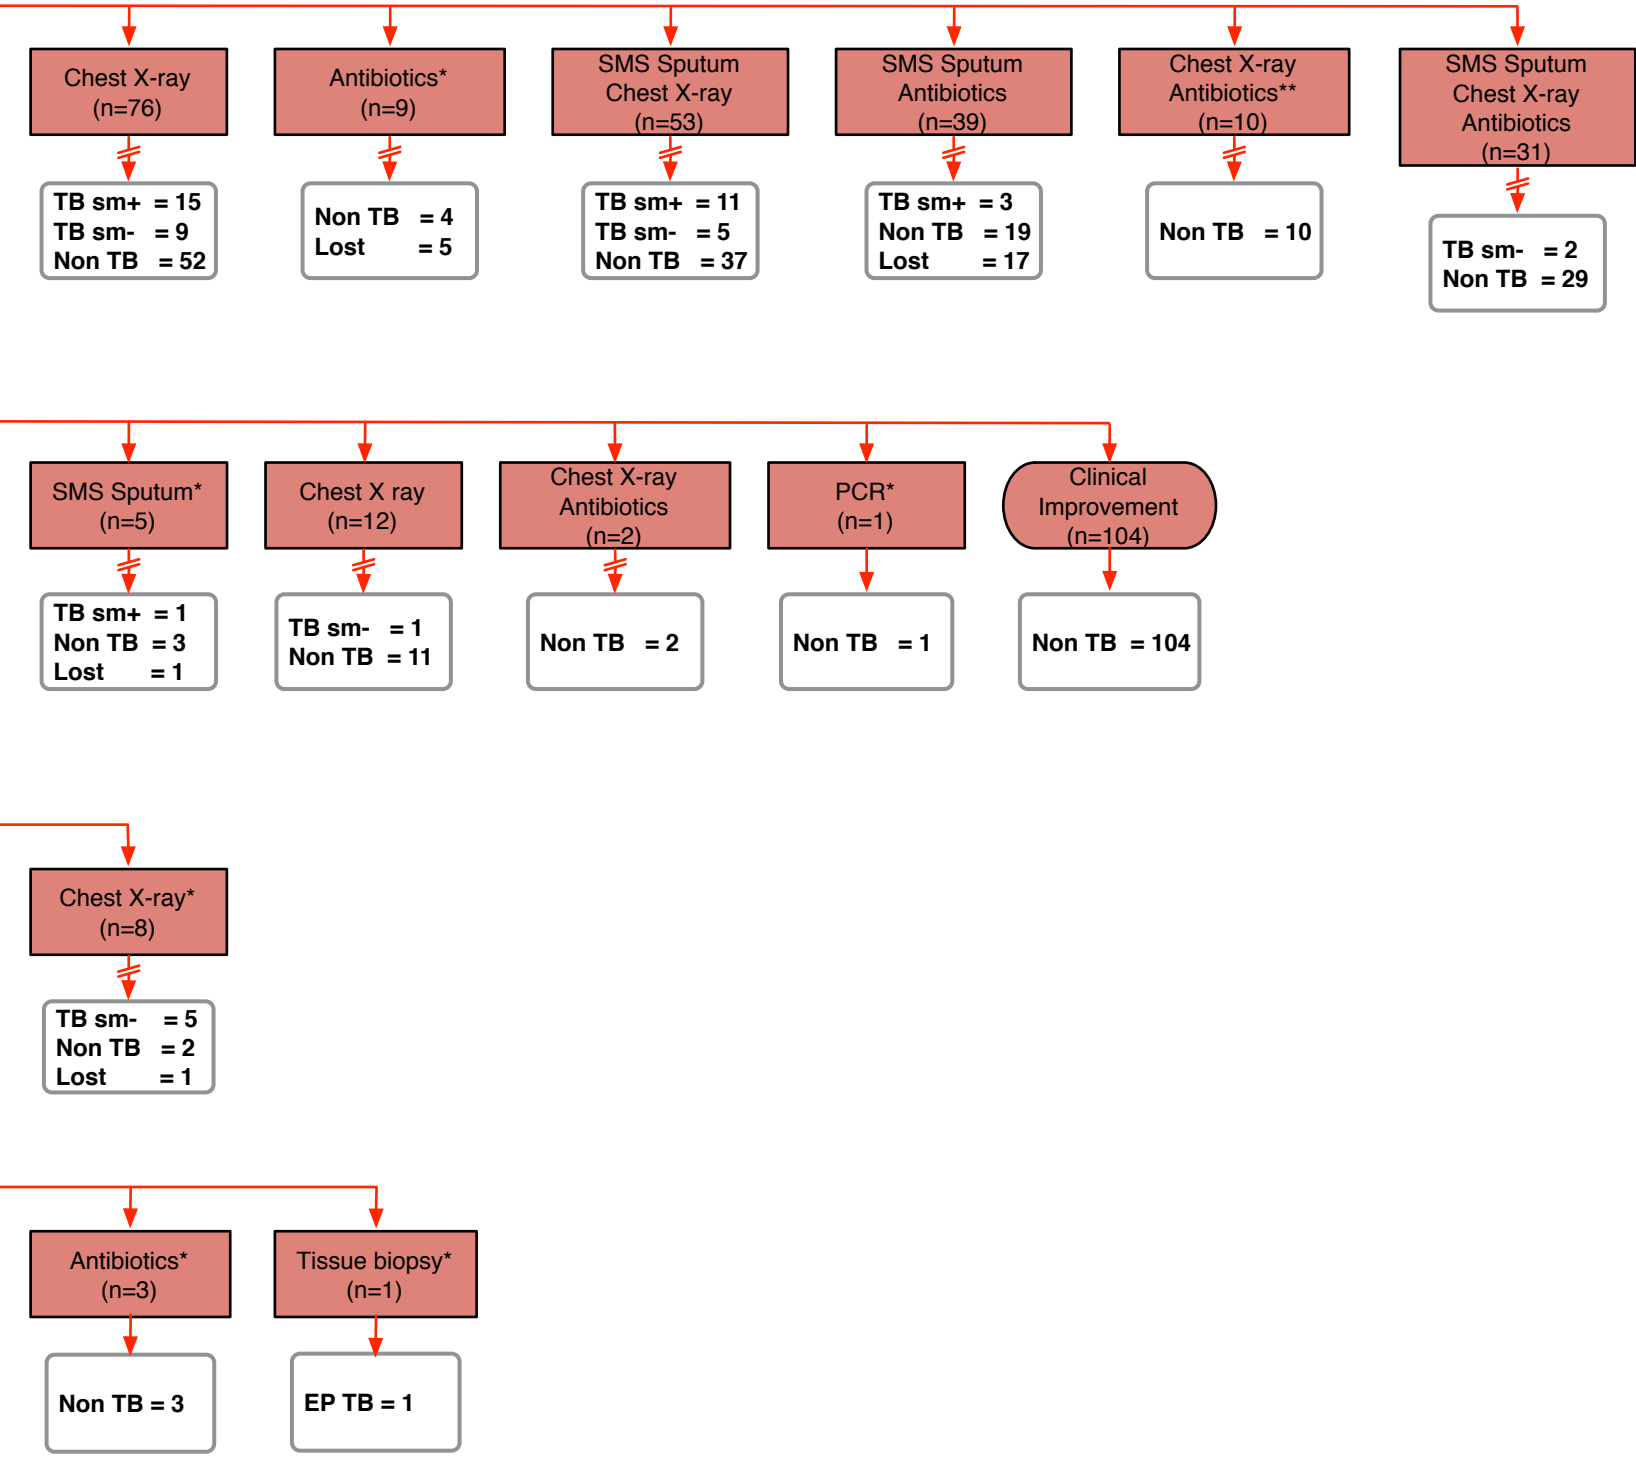

Supplement: MOESM1 [file 9490846]
